# Supplementary material for: Expression of Interleukin-13 Receptor Alpha 2 in Brainstem Gliomas
Source: MDPI journal article supplement (doi:10.3390/cancers16010228), 2024-01-03
Supplement: s1 [file s1]

**Table S1** Clinical characteristics of TMA cohort and BA cohort

|           |                   | TMA cohort | BA cohort |
|-----------|-------------------|------------|-----------|
| Total     |                   | 80         | 98        |
| Gender    | Female            | 43         | 48        |
|           | Male              | 37         | 50        |
| Age       | ≤14 years         | 41         | 38        |
|           | > 14 years        | 39         | 60        |
| Location  | Thalamus          | 5          | 0         |
|           | Midbrain          | 14         | 14        |
|           | Pons              | 38         | 54        |
|           | Medulla oblongata | 23         | 30        |
| WHO-Grade | 1                 | 9          | 8         |
|           | 2                 | 19         | 23        |
|           | 3                 | 3          | 9         |
|           | 4                 | 49         | 60        |
| DIPG      | No                | 44         | 68        |
|           | Yes               | 36         | 31        |

**Table S2** IL13Ra2 expression in different BSG subgroups in TMA cohort

|           |                    | IL13Ra2 |        |        |         |        |        |         |        |        |         |
|-----------|--------------------|---------|--------|--------|---------|--------|--------|---------|--------|--------|---------|
|           |                    | Total   | ≤10%   | >10%   | P-value | ≤20%   | >20%   | P-value | ≤50%   | >50%   | P-value |
| Total     |                    | 80      | 33     | 47     |         | 44     | 36     |         | 65     |        |         |
| Gender    | Female             | 43      | 16     | 27     | 0.429   | 22     | 21     | 0.457   | 32     | 11     | 0.091   |
|           | Male               | 37      | 17     | 20     |         | 22     | 15     |         | 33     | 4      |         |
| Age       | ≤14 years          | 41      | 17     | 24     | 0.968   | 24     | 17     | 0.514   | 34     | 7      | 0.694   |
|           | >14 years          | 39      | 16     | 23     |         | 20     | 19     |         | 31     | 8      |         |
| Location  | Thalamus           | 5       | 2      | 3      | 0.008   | 2      | 3      | 0.066   | 4      | 1      | 0.792   |
|           | Midbrain           | 14      | 10     | 4      |         | 11     | 3      |         | 12     | 2      |         |
|           | Pons               | 38      | 9      | 29     |         | 16     | 22     |         | 29     | 9      |         |
|           | Medulla oblongata  | 23      | 12     | 11     |         | 15     | 8      |         | 20     | 3      |         |
| WHO-Grade | 1                  | 9       | 8      | 1      | <0.0001 | 9      | 0      | <0.0001 | 9      | 0      | 0.007   |
|           | 2                  | 19      | 15     | 4      |         | 18     | 1      |         | 19     | 0      |         |
|           | 3                  | 3       | 1      | 2      |         | 2      | 1      |         | 3      | 0      |         |
|           | 4                  | 49      | 9      | 40     |         | 15     | 34     |         | 34     | 15     |         |
| DIPG      | No                 | 44      | 25     | 19     | 0.002   | 29     | 15     | 0.030   | 37     | 7      | 0.472   |
|           | Yes                | 36      | 8      | 28     |         | 15     | 21     |         | 28     | 8      |         |
| H3F3A     | Wild-type          | 14      | 14     | 0      | <0.0001 | 14     | 0      | <0.0001 | 14     | 0      | 0.070   |
|           | Mutant             | 22      | 0      | 22     |         | 4      | 18     |         | 17     | 5      |         |
|           | Unknown            | 44      | 19     | 25     |         | 26     | 18     |         | 34     | 10     |         |
| H3.3      | (H3.3-mutant) ≤10% | 33      | 28     | 5      | <0.0001 | 31     | 2      | <0.0001 | 33     | 0      | <0.001  |
|           | (H3.3-wild) >10%   | 47      | 5      | 42     |         | 13     | 34     |         | 32     | 15     |         |
| H3.3      | (median)           | 43.37%  | 0.10%  | 57.91% | <0.0001 | 0.41%  | 62.62% | <0.0001 | 8.66%  | 66.11% | <0.001  |
| Ki67      | (median)           | 10.60%  | 1.11%  | 25.29% | <0.0001 | 1.85%  | 29.43% | <0.0001 | 4.69%  | 64.61% | <0.0001 |
| CD133     | (median)           | 1.34%   | 0.04%  | 4.51%  | <0.0001 | 0.08%  | 9.72%  | <0.0001 | 0.69%  | 46.66% | <0.0001 |
| HLA1      | (median)           | 99.19%  | 99.22% | 98.96% | 0.126   | 99.01% | 99.20% | 0.832   | 99.03% | 99.30% | 0.848   |
| CD4       | (median)           | 0.16%   | 0.22%  | 0.10%  | 0.183   | 0.22%  | 0.10%  | 0.134   | 0.18%  | 0.10%  | 0.661   |
| CD8       | (median)           | 0.20%   | 0.35%  | 0.13%  | 0.018   | 0.35%  | 0.12%  | 0.013   | 0.22%  | 0.19%  | 0.943   |

**Table S3** Multiple linear regression of IL13Ra2 expression in TMA cohort

| Variables   | $\beta$ | 95% CI   |         | P value |
|-------------|---------|----------|---------|---------|
| Gender      | -2.186  | (-10.323 | 5.95)   | 0.594   |
| Age         | 0.015   | (-0.257  | 0.287)  | 0.912   |
| Location    | 2.044   | (-2.664  | 6.753)  | 0.390   |
| WHO-Grade   | 5.248   | (-1.005  | 11.502) | 0.099   |
| DIPG        | -3.409  | (-14.226 | 7.409)  | 0.532   |
| H3.3-mutant | 24.451  | (12.024  | 36.877) | <0.001  |

**Table S4** Spearman correlation analyses of IL13Ra2 expression in TMA cohort

|         |                         | H3.3K27M | Ki67    | CD133   | HLA1   | CD4    | CD8    |
|---------|-------------------------|----------|---------|---------|--------|--------|--------|
| IL13Ra2 | correlation coefficient | 0.796    | 0.719   | 0.826   | -0.089 | -0.070 | -0.193 |
|         | P-value                 | <0.0001  | <0.0001 | <0.0001 | 0.431  | 0.537  | 0.094  |
|         | Number of cases         | 80       | 80      | 80      | 80     | 80     | 76*    |

\* FFPE tumor tissue sections for four cases have been exhausted.

**Table S5** Multivariate Cox regression for survival analysis in TMA cohort

| TMA cohort       | Univariate Cox regression |         | Multivariate Cox regression |         |
|------------------|---------------------------|---------|-----------------------------|---------|
|                  | HR (95% CI)               | P       | HR (95% CI)                 | P       |
| Gender           | 1.408(0.704-2.815)        | 0.334   | 0.887(0.425-1.851)          | 0.749   |
| Age              | 0.981(0.958-1.005)        | 0.126   | 0.992(0.964-1.020)          | 0.563   |
| DIPG             | 3.383(1.633-7.009)        | 0.001   | 2.061(0.818-5.194)          | 0.125   |
| IL13Ra2(>20%)    | 2.520(1.228-5.099)        | 0.012   | 0.822(0.375-1.799)          | 0.623   |
| H3F3A (H3.3>10%) | 9.585(3.268-28.106)       | <0.0001 | 9.228(2.685-31.714)         | <0.0001 |
| Ki67             | 1.019(1.007-1.031)        | 0.001   | 1.003(0.988-1.017)          | 0.725   |
| CD133            | 1.014(0.996-1.033)        | 0.132   |                             |         |
| HLA-1            | 1.005(0.984-1.026)        | 0.668   |                             |         |
| CD4              | 0.447(0.162-1.232)        | 0.120   |                             |         |
| Grade (IV)       |                           | 0.006   |                             |         |
| I                | <0.001                    | 0.978   |                             |         |
| II               | 0.019(0.002-0.173)        | <0.0001 |                             |         |
| III              | 0.098(0.011-0.902)        | 0.040   |                             |         |

**Table S6** Multivariate Cox regression for survival analysis in BA cohort

| BA cohort                   | Univariate Cox regression |        | Multivariate Cox regression |       |
|-----------------------------|---------------------------|--------|-----------------------------|-------|
|                             | HR                        | P      | coef                        | P     |
| Age                         | 0.978                     | 0.015  | 0.976                       | 0.150 |
| Gender                      | 0.989                     | 0.966  | -                           | -     |
| Location (Midbrain)         |                           |        |                             |       |
| Medulla                     | 0.997                     | 0.995  | 1.594                       | 0.489 |
| Pons                        | 2.982                     | 0.022  | 1.985                       | 0.336 |
| DIPG                        | 3.394                     | <0.001 | 1.039                       | 0.936 |
| Grade (IV)                  | -                         | -      | -                           | -     |
| I                           | <0.001                    | 0.997  | <0.001                      | 0.998 |
| II                          | 0.076                     | <0.001 | 0.206                       | 0.001 |
| III                         | 0.276                     | <0.001 | 0.573                       | 0.158 |
| H3F3A                       | 8.0172                    | <0.001 | 1.157                       | 0.788 |
| Methylation Cluster(H3-Pon) | -                         | -      | -                           | -     |
| IDH                         | 0.049                     | <0.001 | 0.075                       | 0.009 |
| H3-Medulla                  | 0.268                     | <0.001 | 0.599                       | 0.380 |
| PA-like                     | <0.001                    | 0.996  | <0.001                      | 0.996 |
| IL13RA2_Group               | 2.128                     | 0.009  | 1.742                       | 0.144 |
